# Supplementary material for: Proteomic Analysis of S-Acylated Proteins in Human B Cells Reveals Palmitoylation of the Immune Regulators CD20 and CD23
Source: PLoS One. 2012 May 17;7(5):e37187. doi: 10.1371/journal.pone.0037187 (PMC3355122; doi:10.1371/journal.pone.0037187)
Supplement: Table S2 — Detail of the distribution of the proteins meeting selection criteria. HA+ only : proteins identified in HA+ samples exclusively. Common proteins: proteins identified in both HA+ and HA− samples. P-value: p-value related to the spectral index analysis. (XLS) [file pone.0037187.s002.xls]

## Sheet: Feuil1
Supplementary Table S2: Detail of the distribution of the proteins meeting selection criteria HA+ only : proteins identified in HA+ samples exclusively. Common proteins: proteins identified in both HA+ and HA- samples. P-value: p-value related to the spectral index analysis.
	Proteins meeting the criteria	Known palmitoylated proteins	Candidates	Candidates identified in previous proteomic studies	Novel candidates including MHC molecules	MHC molecules	Novel candidates w/o MHC molecules
HA+ only, > 5 spectra	57	16	41	30	11	2	9
Common proteins, p-value<0.05	82	28	54	8	46	44	2
Total	139	44	95	38	57	46	11
