# Supplementary material for: Proteomic Analysis of S-Acylated Proteins in Human B Cells Reveals Palmitoylation of the Immune Regulators CD20 and CD23
Source: PLoS One. 2012 May 17;7(5):e37187. doi: 10.1371/journal.pone.0037187 (PMC3355122; doi:10.1371/journal.pone.0037187)
Supplement: Table S3 — Candidate palmitoylated proteins. Proteins meeting our criteria of potential palmitoylation are listed. They include well-established palmitoylated proteins («Established»), proteins previously identified as candidates in proteomic screens («Proteomics»), and novel candidates («Novel»). They are classified according to their associated biological process as indicated in the Human Protein Reference Database and manually reviewed. NA (not applicable): no SpI was calculated for proteins identified exclusively in HA+ samples. (XLS) [file pone.0037187.s003.xls]

## Sheet: Feuil1
Supplementary Table S3: Candidate palmitoylated proteins. Proteins meeting our criteria of potential palmitoylation are listed. They include well-established palmitoylated proteins (« Established »), proteins previously identified as candidates in proteomic screens (« Proteomics »), and novel candidates (« Novel »). They are classified according to their associated biological process as indicated…
Biological process	Gene Name	Description		SpI	Spectral count	Status
Signal transduction
	IFITM1	Interferon induced transmembrane protein 1 (9-27)		NA	9	Novel
	MS4A1	B-lymphocyte antigen CD20		0.88	39	Novel
	TNFRSF8	Tumor necrosis factor receptor superfamily member 8		NA	5	Novel
	AUP1	Ancient ubiquitous protein 1		NA	8	Proteomics
	RALA	Ras-related protein Ral-A		NA	9	Proteomics
	RALB	Ras-related protein Ral-B		NA	7	Proteomics
	RRAS2	Ras-related protein R-Ras2		0.88	65	Proteomics
	SCARB1	Scavenger receptor class B member 1		NA	13	Proteomics
	SCARB2	Lysosome membrane protein 2		NA	13	Proteomics
	TRAF3IP3	TRAF3-interacting JNK-activating modulator		NA	6	Proteomics
	CD44	CD44 antigen		0.88	83	Established
	CD63	CD63 antigen		NA	21	Established
	CD82	CD82 antigen		0.91	53	Established
	FAS	Tumor necrosis factor receptor superfamily member 6		0.87	35	Established
	FLOT2	Flotillin-2		0.93	146	Established
	FYN	Proto-oncogene tyrosine-protein kinase Fyn		NA	5	Established
	GNA13	Guanine nucleotide-binding protein subunit alpha-13		0.84	35	Established
	GNAI2	Guanine nucleotide-binding protein G(i), alpha-2 subunit		0.72	228	Established
	GNAI3	Guanine nucleotide-binding protein G(k) subunit alpha		0.71	163	Established
	GNAS	Guanine nucleotide-binding protein G(s) subunit alpha isoforms XLas		0.87	44	Established
	HRAS	GTPase HRas		0.71	22	Established
	LAT2	Linker for activation of T-cells family member 2		0.62	16	Established
	LCK	Proto-oncogene tyrosine-protein kinase LCK		NA	8	Established
	NRAS	GTPase NRas		0.72	23	Established
	PECAM1	Platelet endothelial cell adhesion molecule		NA	9	Established
	PI4K2A	Phosphatidylinositol 4-kinase type 2-alpha		NA	7	Established
	PLSCR1	Phospholipid scramblase 1		0.6	44	Established
	RAP2A	Ras-related protein Rap-2a		0.94	75	Established
	RAP2B	Ras-related protein Rap-2b		0.93	98	Established
	RAP2C	Ras-related protein Rap-2c		0.92	85	Established
	RFTN1	Raftlin		0.61	64	Established
	RRAS	Ras-related protein R-Ras		NA	24	Established
	STOM	Erythrocyte band 7 integral membrane protein		0.88	163	Established
	STX6	Syntaxin-6		NA	8	Established
Vesicular transport
	BET1	BET1 homolog		NA	10	Proteomics
	SCAMP2	Secretory carrier-associated membrane protein 2		NA	13	Proteomics
	SCAMP3	Secretory carrier-associated membrane protein 3		NA	53	Proteomics
	STX11	Syntaxin-11		NA	19	Proteomics
	VAMP3	Vesicle-associated membrane protein 3		NA	13	Proteomics
	VAMP7	Vesicle-associated membrane protein 7		0.88	37	Proteomics
	GOLGA7	Golgin subfamily A member 7		0.91	54	Established
	SCAMP1	Secretory carrier-associated membrane protein 1		NA	10	Established
	SNAP23	Synaptosomal-associated protein 23		0.82	72	Established
	STX12	Syntaxin-12		NA	10	Established
	STX7	Syntaxin-7		NA	8	Established
	STX8	Syntaxin-8		NA	12	Established
	TRAPPC3	Trafficking protein particle complex subunit 3		0.7	14	Established
Molecular transport
	ALB	Serum albumin		NA	6	Proteomics
	SLC1A4	Neutral amino acid transporter A		0.83	32	Proteomics
	SLC1A5	Neutral amino acid transporter B(0)		NA	70	Proteomics
	SLC44A1	Choline transporter-like protein 1		NA	10	Proteomics
	STARD3NL	MLN64 N-terminal domain homolog		NA	11	Proteomics
	PLSCR3	Phospholipid scramblase 3		0.76	18	Established
	TFRC	Transferrin receptor protein 1		0.88	38	Established
Immune response
	CD74	CD74 antigen (Invariant polypeptide of major histocompatibility complex, class II antigen-associated), isoform CRA_b		0.66	273	Novel
	FCER2	Low affinity immunoglobulin epsilon Fc receptor		NA	43	Novel
	HLA-B	HLA class I histocompatibility antigen, B-18 alpha chain		0.87	569	Novel
	HLA-B	HLA class I histocompatibility antigen, B-38 alpha chain		0.85	619	Novel
	HLA-B	HLA class I histocompatibility antigen, B-55 alpha chain		0.87	431	Novel
	HLA-B	HLA class I histocompatibility antigen, B-73 alpha chain		0.56	262	Novel
	HLA-B	MHC class I antigen		0.87	443	Novel
	HLA-B	MHC class I antigen		0.86	433	Novel
	HLA-B	MHC class I antigen		0.85	615	Novel
	HLA-B	MHC class I antigen (Fragment)		NA	18	Novel
	HLA-B	MHC class I antigen (Fragment)		0.89	86	Novel
	HLA-B	MHC class I antigen (Fragment)		0.87	355	Novel
	HLA-B	MHC class I antigen (Fragment)		0.85	355	Novel
	HLA-B	MHC class I antigen (Fragment)		0.85	359	Novel
	HLA-B	MHC class I antigen (Fragment)		0.84	359	Novel
	HLA-B	MHC class I antigen (Fragment)		0.83	368	Novel
	HLA-B	MHC class I antigen (Fragment)		0.82	551	Novel
	HLA-B	MHC class I antigen (Fragment)		0.82	382	Novel
	HLA-B	MHC class I antigen (Fragment)		0.82	527	Novel
	HLA-B	MHC class I antigen (Fragment)		0.79	301	Novel
	HLA-B	MHC class I antigen (Fragment)		0.77	345	Novel
	HLA-B	MHC class I antigen (Fragment)		0.76	446	Novel
	HLA-B	MHC class I antigen (Fragment)		0.74	161	Novel
	HLA-B	MHC class I antigen (Fragment)		0.74	292	Novel
	HLA-B	MHC class I antigen (Fragment)		0.72	300	Novel
	HLA-B	MHC class I antigen (Fragment)		0.72	308	Novel
	HLA-B	MHC class I antigen (Fragment)		0.67	170	Novel
	HLA-B	MHC class I antigen (Fragment)		0.6	189	Novel
	HLA-B	MHC class I antigen (Fragment)		0.6	193	Novel
	HLA-B	MHC class I antigen (Fragment)		0.6	201	Novel
	HLA-C	HLA class I histocompatibility antigen, Cw-12 alpha chain		0.67	256	Novel
	HLA-C	HLA class I histocompatibility antigen, Cw-17 alpha chain		0.7	216	Novel
	HLA-C	HLA class I histocompatibility antigen, Cw-3 alpha chain		0.69	142	Novel
	HLA-C	HLA class I histocompatibility antigen, Cw-6 alpha chain		0.75	409	Novel
	HLA-C	HLA class I histocompatibility antigen, Cw-7 alpha chain		0.75	414	Novel
	HLA-C	MHC class I antigen		0.62	158	Novel
	HLA-C	MHC class I antigen (Fragment)		NA	26	Novel
	HLA-C	MHC class I antigen (Fragment)		0.73	349	Novel
	HLA-C	MHC class I antigen (Fragment)		0.72	157	Novel
	HLA-C	MHC class I antigen (Fragment)		0.72	325	Novel
	HLA-C	MHC class I antigen (Fragment)		0.71	142	Novel
	HLA-C	MHC class I antigen (Fragment)		0.69	321	Novel
	HLA-C	MHC class I antigen (Fragment)		0.68	298	Novel
	HLA-C	MHC class I antigen (Fragment)		0.57	133	Novel
	HLA-Cw	MHC class I antigen		0.74	413	Novel
	HLA-Cw	MHC class I antigen (Fragment)		0.71	165	Novel
	HLA-Cw	MHC class I antigen (Fragment)		0.7	170	Novel
	HLA-G	HLA class I histocompatibility antigen, alpha chain G		0.58	15	Novel
	BST2	Bone marrow stromal antigen 2		0.72	46	Proteomics
	CD70	CD70 antigen		0.71	42	Proteomics
	CD53	Leukocyte surface antigen CD53		0.66	12	Established
	CD9	CD9 antigen		NA	11	Established
Protein metabolism
	MRPS18B	28S ribosomal protein S18b, mitochondrial		NA	5	Novel
	PPIF	Peptidyl-prolyl cis-trans isomerase, mitochondrial		NA	7	Novel
	ADAM10	Disintegrin and metalloproteinase domain-containing protein 10		NA	7	Proteomics
	LNPEP	Leucyl-cystinyl aminopeptidase		NA	7	Proteomics
	RPL3	60S ribosomal protein L3		NA	10	Proteomics
	RPL4	60S ribosomal protein L4		NA	5	Proteomics
	M6PR	Cation-dependent mannose-6-phosphate receptor		NA	80	Established
Miscellaneous
	PUS1	tRNA pseudouridine synthase A		NA	5	Novel
	MRPL12	39S ribosomal protein L12, mitochondrial		NA	5	Proteomics
	PSEN1	Presenilin-1		NA	17	Proteomics
	CANX	Calnexin		0.93	90	Established
	CANX	Calnexin (Fragment)		0.9	36	Established
	CKAP4	Cytoskeleton-associated protein 4		0.6	41	Established
	FLOT1	Flotillin-1		0.9	216	Established
Metabolism ; Energy pathways
	B4GALT1	Beta-1,4-galactosyltransferase 1		NA	6	Proteomics
	TMX1	Thioredoxin-related transmembrane protein 1		0.74	50	Proteomics
	CD81	CD81 antigen		NA	13	Established
	ENTPD1	Ectonucleoside triphosphate diphosphohydrolase 1		NA	30	Established
Unknown biological process
	CCDC109A	Coiled-coil domain-containing protein 109A		NA	6	Novel
	KIAA2013	Uncharacterized protein KIAA2013		NA	10	Novel
	TMEM184C	Transmembrane protein 184C		NA	6	Novel
	C8orf82	UPF0598 protein C8orf82		NA	9	Proteomics
	FAM162A	UPF0389 protein FAM162A		NA	8	Proteomics
	MBLAC2	Metallo-beta-lactamase domain-containing protein 2		NA	6	Proteomics
	MLEC	Malectin		0.8	138	Proteomics
	MREG	Melanoregulin		NA	12	Proteomics
	MTDH	Protein LYRIC		NA	103	Proteomics
	PRAF2	PRA1 family protein 2		NA	5	Proteomics
	TMEM222	Transmembrane protein 222		0.64	11	Proteomics
	TMEM55B	Transmembrane protein 55B		NA	5	Proteomics
	TMEM63A	Transmembrane protein 63A		NA	13	Proteomics
	C11orf59	UPF0404 protein C11orf59		0.78	40	Established
	ERGIC3	Endoplasmic reticulum-Golgi intermediate compartment protein 3		NA	16	Established
